# Supplementary material for: Rational design of a two-dimensional high-temperature ferromagnet from HCP cobalt
Source: Royal Society of Chemistry journal article supplement (doi:10.1039/d4cp01390e), 2024-01-01
Supplement: d4cp01390e1.pdf [file d4cp01390e1.pdf]

**Electronic Supporting Information:**  
**Rational Design of Two-Dimensional High-Temperature Ferromagnet from HCP  
Cobalt**

Bo-Jing Wang\*,<sup>1</sup> Yi-Na Hou\*,<sup>1</sup> Chen-Dong Jin,<sup>1</sup> Hu Zhang,<sup>1</sup> Jiang-Long Wang,<sup>1</sup>  
Peng-Lai Gong,<sup>1</sup> Ru-Qian Lian,<sup>1</sup> Xing-Qiang Shi,<sup>1</sup> and Rui-Ning Wang<sup>†1</sup>

<sup>1</sup>*Key Laboratory of Optic-Electronic Information and Materials of Hebei Province,  
National-Local Joint Engineering Laboratory of New Energy Photoelectric Devices,  
Hebei Research Center of the Basic Discipline for Computational Physics,  
Key Laboratory of High-precision Computation and Application of Quantum Field Theory of Hebei Province,  
College of Physics Science and Technology, Hebei University, Baoding 071002, People's Republic of China*  
(Dated: July 12, 2024)

---

\* These authors contributed equally to this work.

<sup>†</sup> To whom correspondence should be addressed: rnwang@hbu.edu.cn.

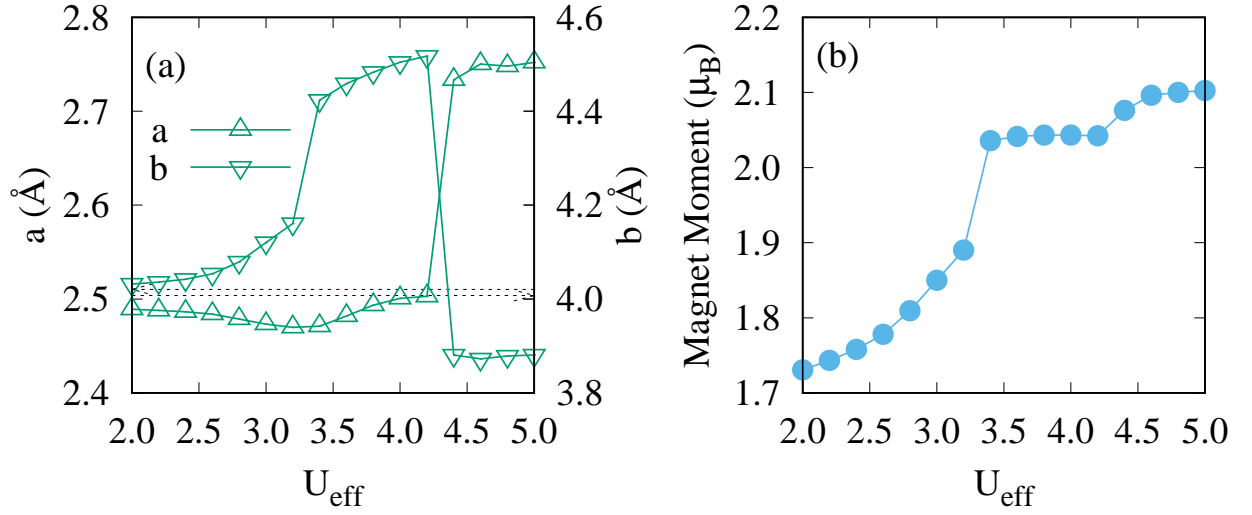

FIG. S1: (Color online). (a) The lattice constants ( $\bar{a}$  and  $\bar{c}$ ) and (b) the magnetic moment ( $\mu_B$ ) per Co atom as a function of  $U_{eff}$  for HCP Co.

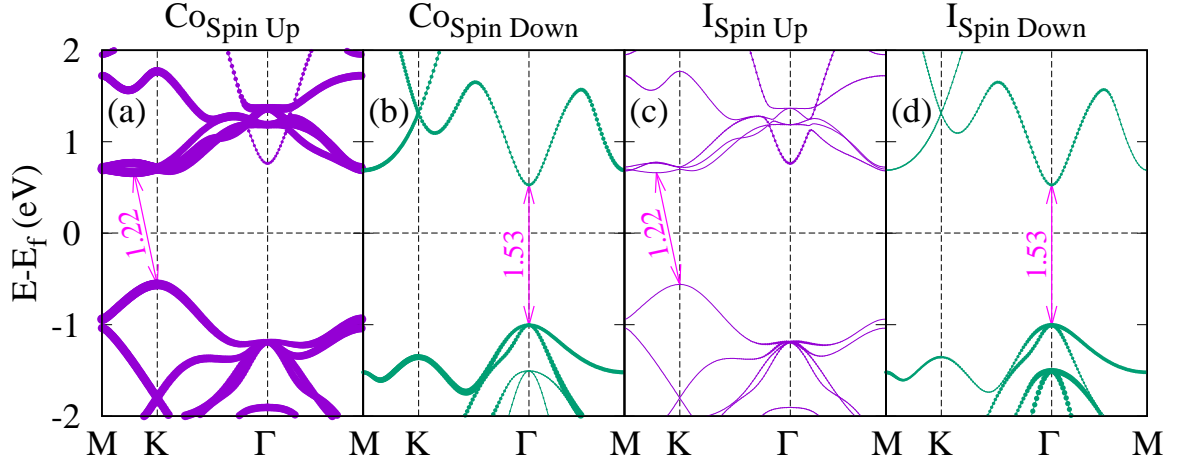

FIG. S2: (Color online). The spin/atom-projected band structures of two-dimensional  $\text{Co}_2\text{I}_2$  at the PBE+U ( $U_{eff}=3.2$  eV) level of theory. (a) Co for spin up; (b) Co for spin down; (c) I for spin up; (d) I for spin down.

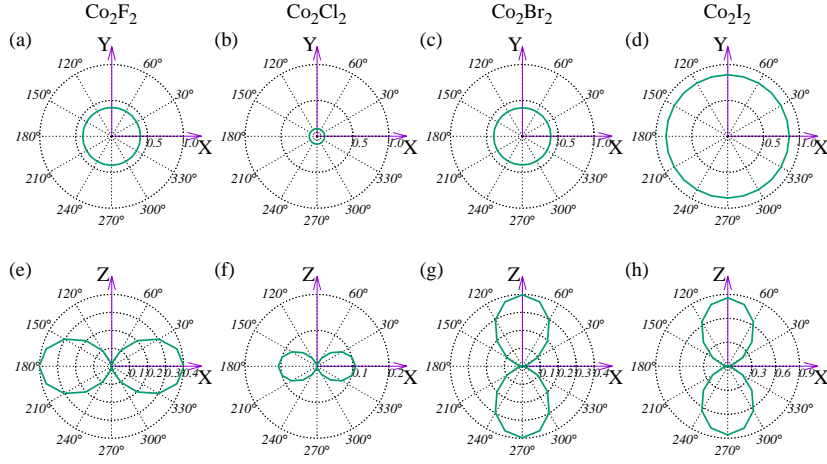

FIG. S3: (Color online). The magnetocrystalline anisotropy energy per Co atom ( $E_{MAE}$ , in  $meV$ ) as a function of the magnetization direction in the XY (a-d) and XZ (e-h) plane at the PBE+U ( $U_{eff}=3.2$  eV) level of theory, respectively. The energy of the configuration with the magnetic moment pointing to (001) for the XY plane or (100) for the XZ plane is set as 0  $eV$ . (a, e)  $Co_2F_2$ , (b, f)  $Co_2Cl_2$ , (c, g)  $Co_2Br_2$  and (d, h)  $Co_2I_2$ .

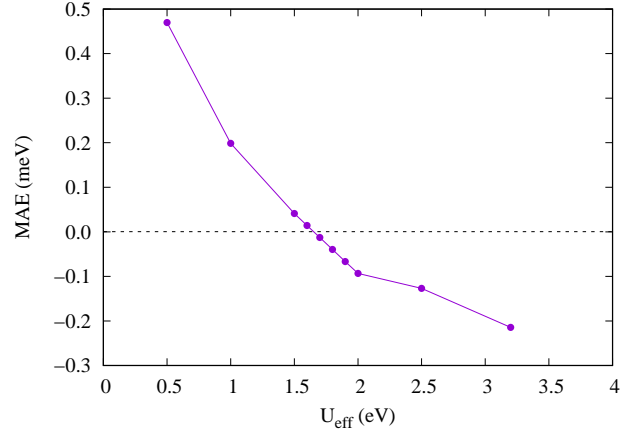

FIG. S4: (Color online). The magnetocrystalline anisotropy energy per Co atom ( $E_{MAE} = E_{(001)} - E_{(100)}$ , in  $meV$ ) as a function of the effective on-site Coulomb interaction ( $U_{eff}$ ) for  $Co_2Cl_2$  at the PBE+U level of theory.

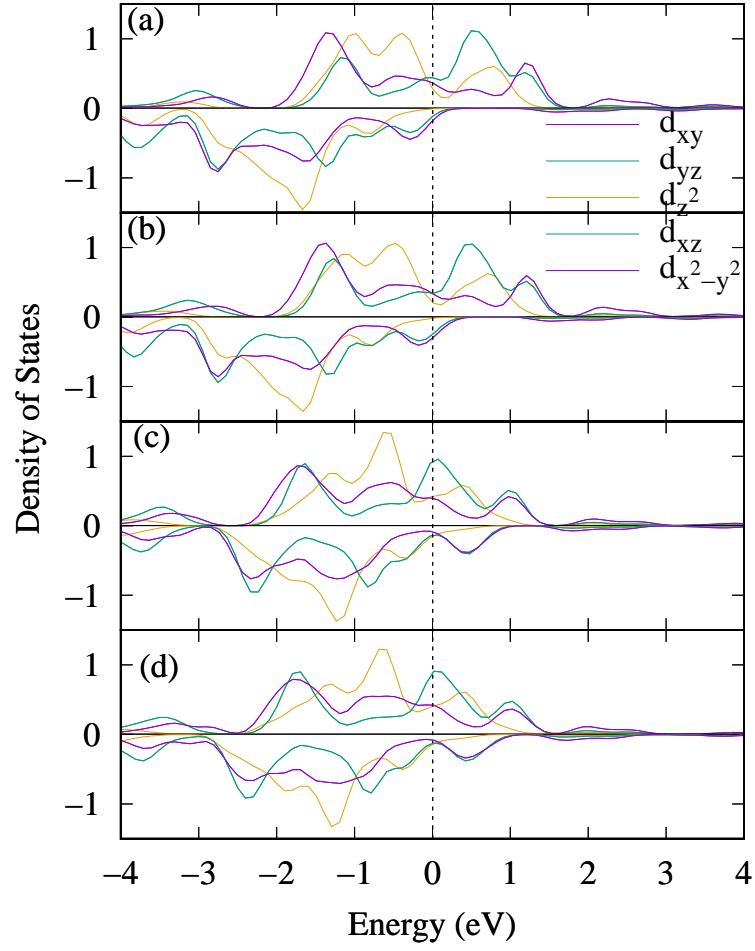

FIG. S5: (Color online). The orbital-projected density of states of  $\text{Co}_2\text{I}_2$  as a function of the in-plane biaxial strain. (a) -2%, (b) -4%, (c) -6% and (d) -8%.

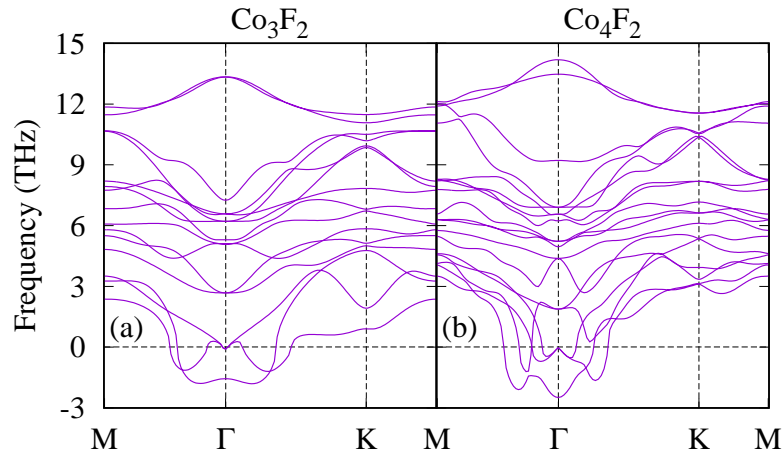

FIG. S6: (Color online). Phonon spectra of free-standing (a)  $\text{Co}_3\text{F}_2$  and (b)  $\text{Co}_4\text{F}_2$  calculated at the PBE level of theory.

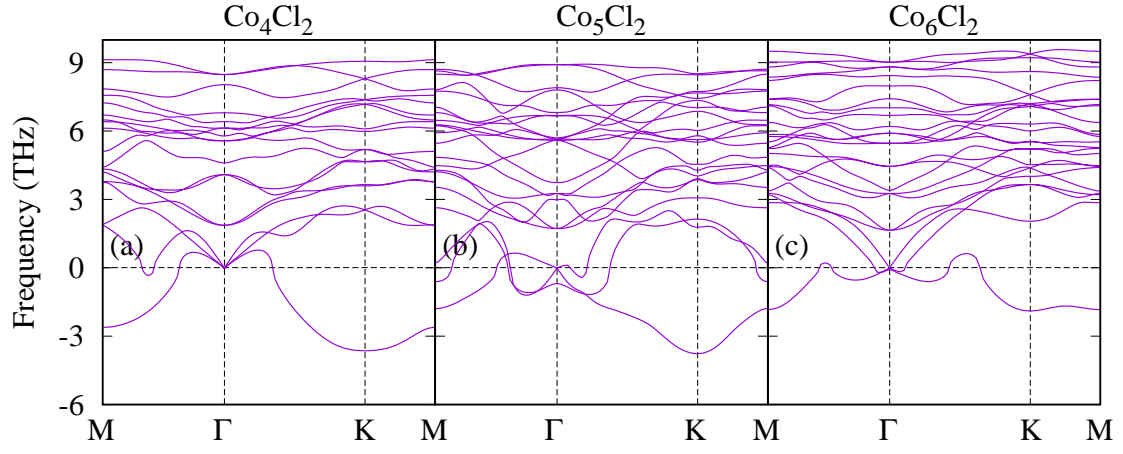

FIG. S7: (Color online). Phonon spectra of free-standing  $\text{Co}_{2n}\text{Cl}_2$  calculated at the PBE level of theory. (a)  $\text{Co}_4\text{Cl}_2$ , (b)  $\text{Co}_5\text{Cl}_2$  and (c)  $\text{Co}_6\text{Cl}_2$ .

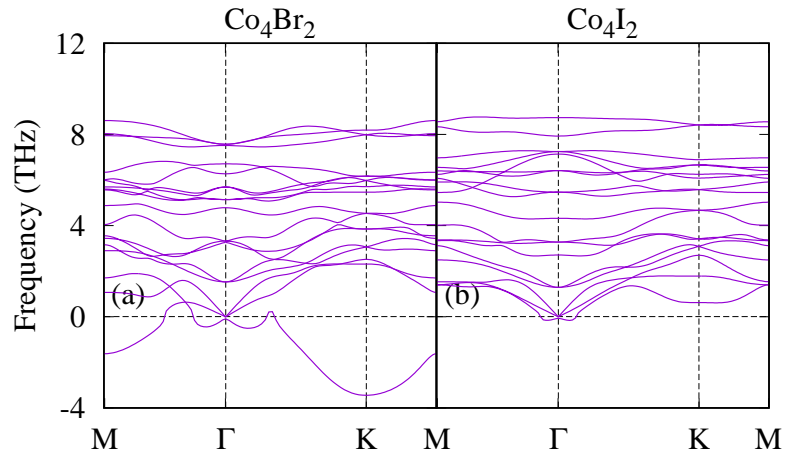

FIG. S8: (Color online). Phonon spectra of free-standing (a)  $\text{Co}_4\text{Br}_2$  and (b)  $\text{Co}_4\text{I}_2$  calculated at the PBE level of theory.
